# Supplementary material for: Immune-Related Functional Differential Gene Expression in Koi Carp (Cyprinus carpio) after Challenge with Aeromonas sobria
Source: MDPI journal article supplement (doi:10.3390/ijms19072107), 2018-07-20
Supplement: s1 [file s1]

**Supplementary Table 1a.** Length distribution of assembled transcripts and unigenes.

| Sample       | PBS_muscle | PBS_spleen | Treat_muscle | Treat_spleen |
|--------------|------------|------------|--------------|--------------|
| Total Number | 39028      | 86458      | 54494        | 81416        |
| Total Length | 21095228   | 49831390   | 31488871     | 50555637     |
| Mean Length  | 540        | 576        | 577          | 620          |
| GC(%)        | 45.82      | 45.77      | 45.9         | 45.82        |

**Supplementary Table 1b.** Summary of annotations of assembled unigenes.

| Values              | Number | Percentage |
|---------------------|--------|------------|
| Total               | 69,480 | 100%       |
| Nr-Annotated        | 42,229 | 60.78%     |
| Nt-Annotated        | 59,255 | 85.28%     |
| Swissprot-Annotated | 35,900 | 51.67%     |
| KEGG-Annotated      | 33,057 | 47.58%     |
| COG-Annotated       | 11,772 | 16.94%     |
| Interpro-Annotated  | 32,085 | 46.18%     |
| GO-Annotated        | 18,764 | 27.01%     |
| Overall             | 60,593 | 87.21%     |

**Supplementary table 2a.** Enrichment of differentially expressed signal transduction pathway annotation in Muscle

| Pathway                           | DEGs genes with pathway annotation (6061) | <u>Pvalue</u> | <u>Ovalue</u> |
|-----------------------------------|-------------------------------------------|---------------|---------------|
| PI3K-Akt signaling pathway        | 317 (5.23%)                               | 0.073479      | 1.59E-01      |
| Rap1 signaling pathway            | 242 (3.99%)                               | 0.949632      | 1.00E+00      |
| MAPK signaling pathway            | 218 (3.6%)                                | 2.31E-05      | 1.41E-04      |
| Ras signaling pathway             | 199 (3.28%)                               | 9.90E-05      | 4.98E-04      |
| cGMP-PKG signaling pathway        | 172 (2.84%)                               | 1.79E-05      | 1.18E-04      |
| TNF signaling pathway             | 169 (2.79%)                               | 5.14E-12      | 1.41E-10      |
| Phospholipase D signaling pathway | 158 (2.61%)                               | 0.000963      | 3.68E-03      |
| cAMP signaling pathway            | 154 (2.54%)                               | 0.000466      | 1.93E-03      |
| Jak-STAT signaling pathway        | 142 (2.34%)                               | 5.15E-11      | 9.72E-10      |

**Supplementary table 2b.** Enrichment of differentially expressed signal transduction pathway annotation in spleen

| Pathway                           | DEGs | <u>Pvalue</u> | <u>Ovalue</u> |
|-----------------------------------|------|---------------|---------------|
| Rap1 signaling pathway            | 327  | 1.98E-07      | 1.25E-06      |
| PI3K-Akt signaling pathway        | 326  | 0.001518      | 3.99E-03      |
| MAPK signaling pathway            | 174  | 0.136221      | 2.13E-01      |
| Ras signaling pathway             | 170  | 0.029429      | 5.81E-02      |
| Phospholipase D signaling pathway | 146  | 0.005209      | 1.21E-02      |
| TNF signaling pathway             | 145  | 3.26E-07      | 1.97E-06      |
| Hippo signaling pathway           | 145  | 0.004469      | 1.05E-02      |
| cAMP signaling pathway            | 136  | 0.016006      | 3.40E-02      |
| NF-kappa B signaling pathway      | 132  | 1.11E-05      | 5.16E-05      |

**Supplementary Table 3a.** Analysis of differentially expressed immune relevant pathway annotation in muscle

| Pathway                                      | DEGs | <u>Pvalue</u> | <u>Qvalue</u> |
|----------------------------------------------|------|---------------|---------------|
| Leukocyte transendothelial migration         | 203  | 0.3303246     | 5.57E-01      |
| Platelet activation                          | 184  | 0.862486      | 1.00E+00      |
| Chemokine signaling pathway                  | 181  | 2.07E-11      | 4.46E-10      |
| T cell receptor signaling pathway            | 147  | 1.01E-06      | 8.22E-06      |
| Fc gamma R-mediated phagocytosis             | 145  | 8.41E-12      | 2.12E-10      |
| Hematopoietic cell lineage                   | 127  | 0.4165758     | 6.42E-01      |
| Natural killer cell mediated cytotoxicity    | 119  | 0.167073      | 3.28E-01      |
| Toll-like receptor signaling pathway         | 114  | 3.14E-10      | 4.74E-09      |
| B cell receptor signaling pathway            | 107  | 2.13E-08      | 2.39E-07      |
| NOD-like receptor signaling pathway          | 98   | 0.108019      | 2.28E-01      |
| Fc epsilon RI signaling pathway              | 76   | 8.79E-07      | 7.37E-06      |
| Antigen processing and presentation          | 75   | 2.65E-08      | 2.86E-07      |
| RIG-I-like receptor signaling pathway        | 65   | 0.00074621    | 2.93E-03      |
| Intestinal immune network for IgA production | 55   | 0.07092996    | 1.54E-01      |
| Complement and coagulation cascades          | 43   | 0.995954      | 1.00E+00      |
| Cytosolic DNA-sensing pathway                | 36   | 0.3221876     | 5.47E-01      |

**Supplementary Table 3b.** Analysis of differentially expressed immune relevant pathway annotation in spleen

| Pathway                                      | DEGs | <u>Pvalue</u> | <u>Qvalue</u> |
|----------------------------------------------|------|---------------|---------------|
| Leukocyte transendothelial migration         | 267  | 4.24E-10      | 4.13E-09      |
| Platelet activation                          | 239  | 3.03E-05      | 1.31E-04      |
| Hematopoietic cell lineage                   | 205  | 1.77E-16      | 4.46E-15      |
| Natural killer cell mediated cytotoxicity    | 171  | 7.72E-12      | 1.17E-10      |
| Chemokine signaling pathway                  | 164  | 1.21E-08      | 9.60E-08      |
| Complement and coagulation cascades          | 163  | 9.08E-41      | 2.74E-38      |
| T cell receptor signaling pathway            | 143  | 4.75E-07      | 2.76E-06      |
| Fc gamma R-mediated phagocytosis             | 107  | 0.001148      | 3.21E-03      |
| Antigen processing and presentation          | 99   | 5.15E-21      | 2.59E-19      |
| B cell receptor signaling pathway            | 87   | 0.00033       | 1.05E-03      |
| Intestinal immune network for IgA production | 86   | 5.21E-11      | 6.55E-10      |
| Toll-like receptor signaling pathway         | 85   | 0.001296      | 3.55E-03      |
| NOD-like receptor signaling pathway          | 80   | 0.662791      | 7.47E-01      |
| Fc epsilon RI signaling pathway              | 56   | 0.017228      | 3.61E-02      |
| RIG-I-like receptor signaling pathway        | 43   | 0.491475      | 5.96E-01      |
| Cytosolic DNA-sensing pathway                | 30   | 0.656418      | 7.42E-01      |

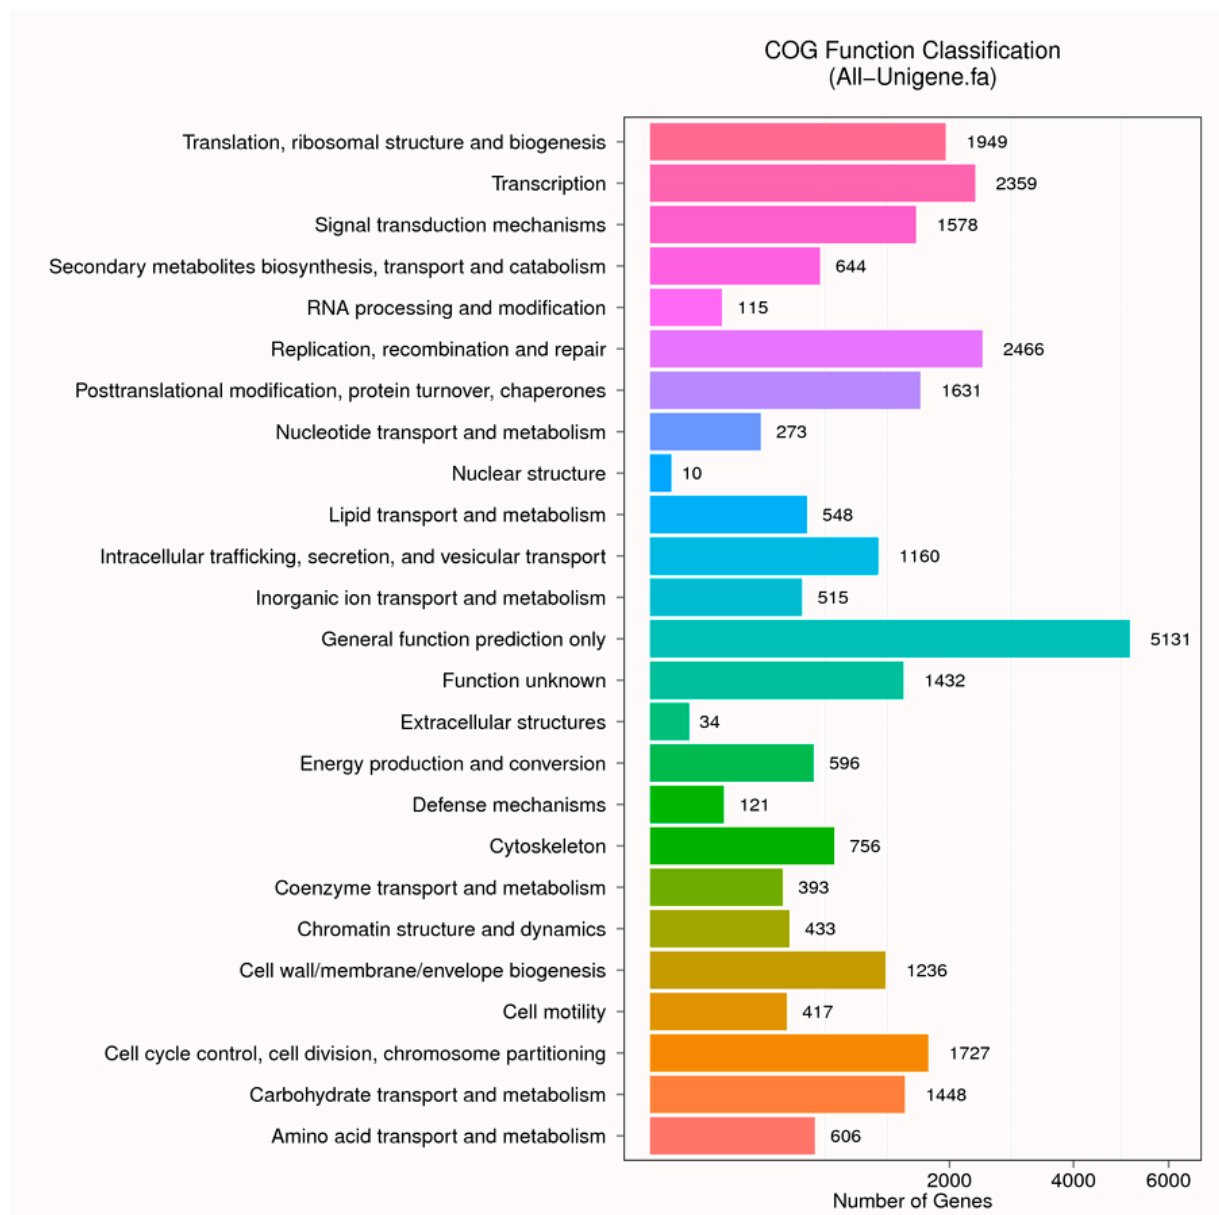

**Supplementary figure 1.** The cluster of orthologous groups (COG) classification.
